# Supplementary material for: Physiological responses and adjustments of corals to strong seasonal temperature variations (20–28°C)
Source: Oxford University Press journal article supplement (doi:10.1242/jeb.244196), 2022-06-15
Supplement: jeb244196supp.pdf [file jeb244196supp.pdf]

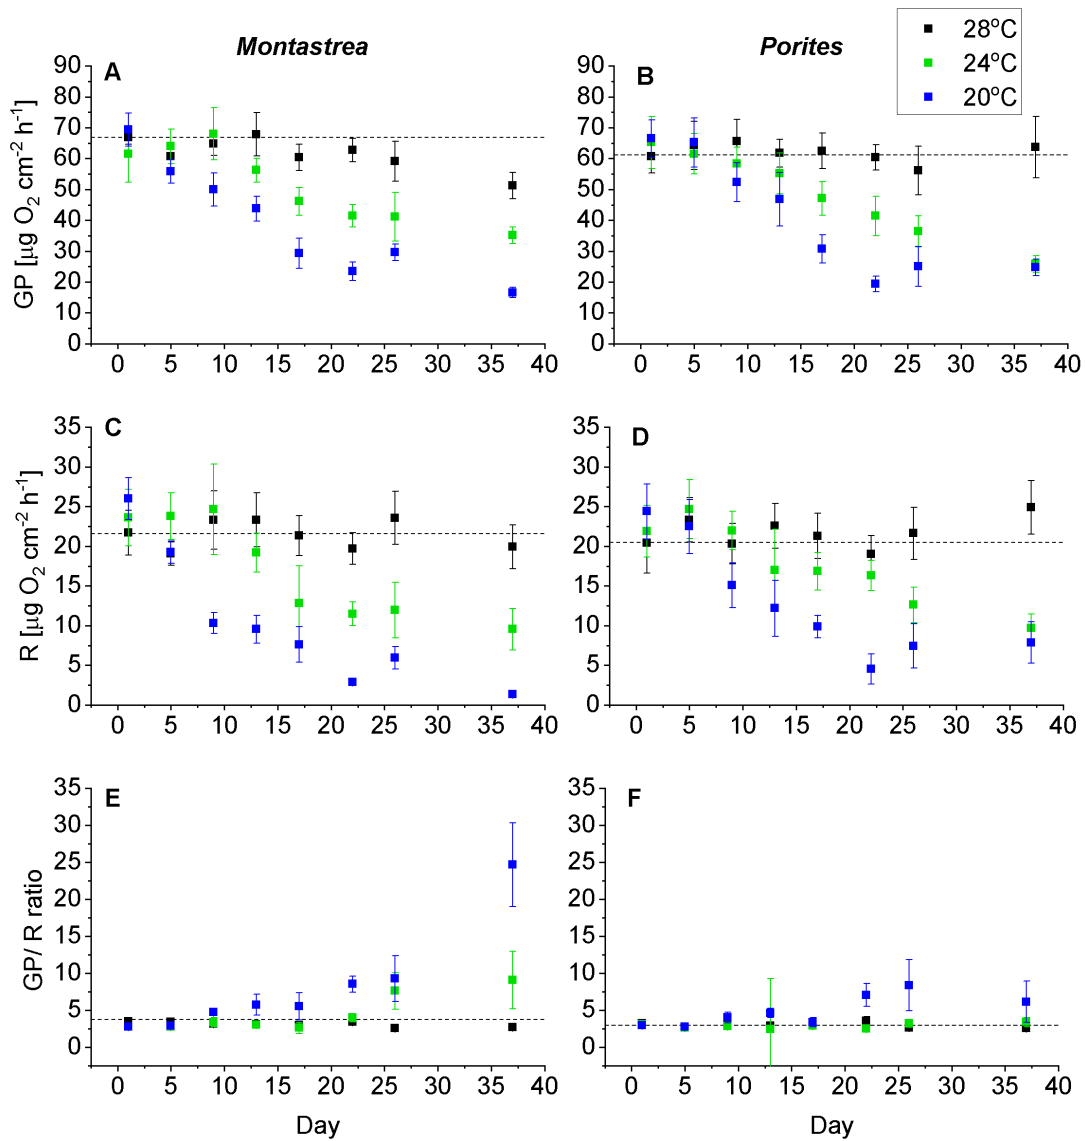

**Fig. S1.** Metabolic rates measured through-out the course of the experiment. **A + B)** Gross photosynthesis (GP), **C + D)** Respiration (R) and **E + F)** GP/R ratio of *Montastrea cavernosa* and *Porites astreoides*. Mean  $\pm$  standard error. Dashed line serves as a reference line at the value measured in the control treatment on day 1 (28°C).

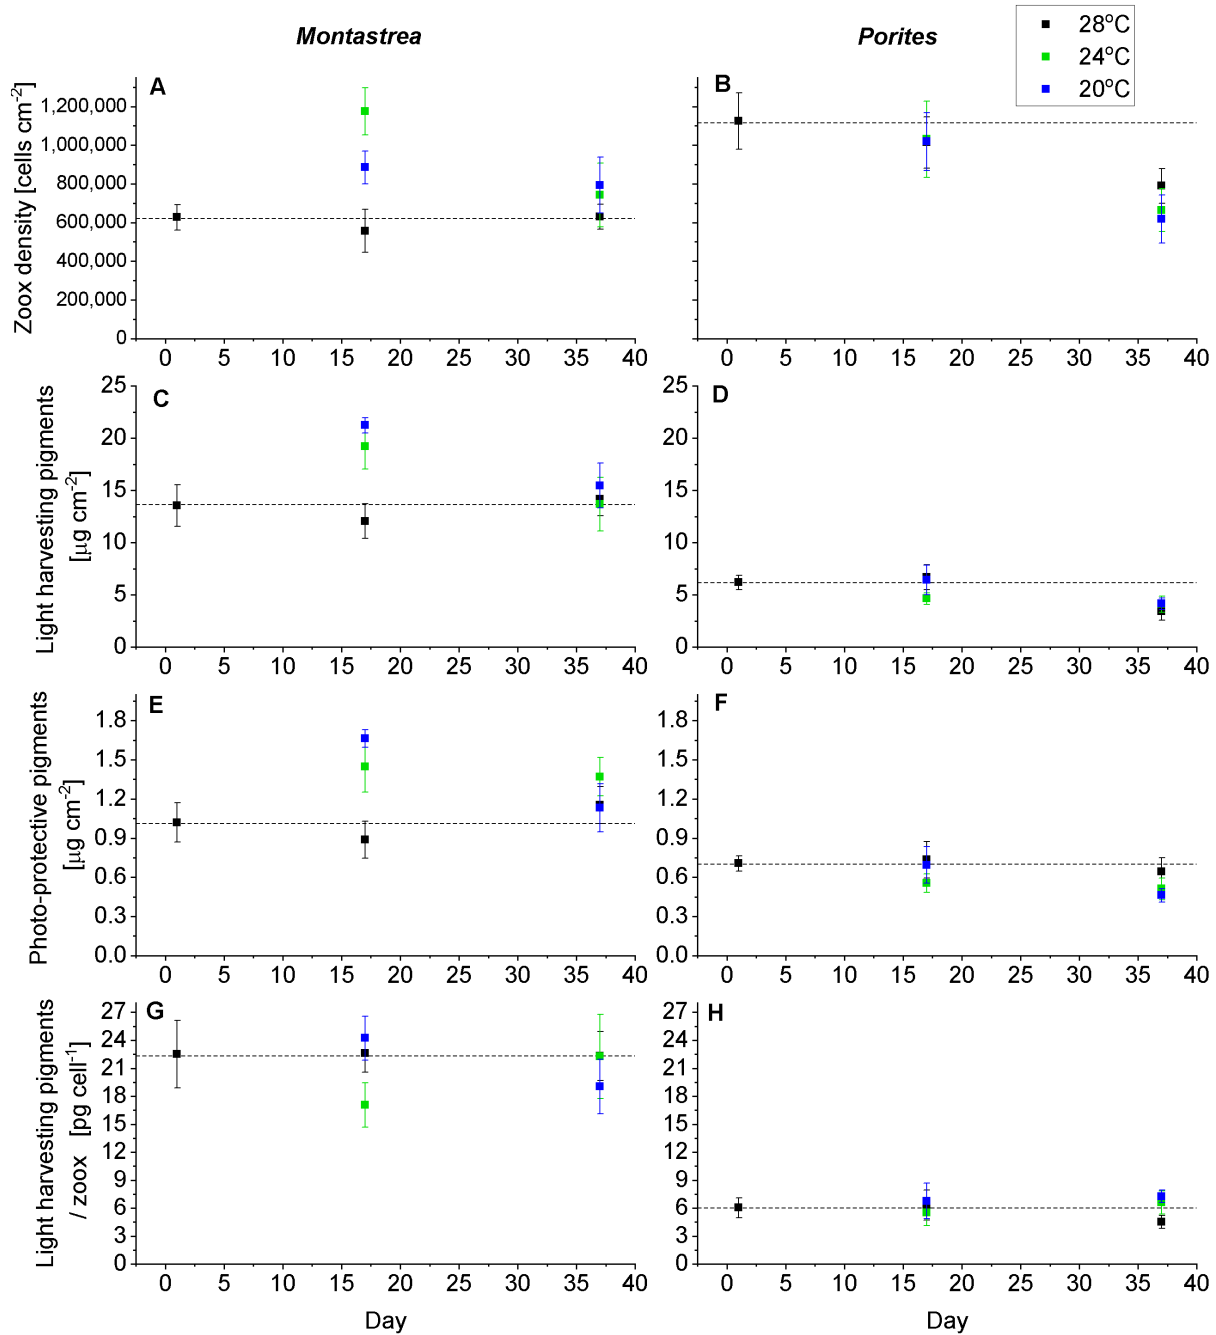

**Fig. S2.** Zooxanthellae tissue metrics measured throughout the course of the experiment. **A + B)** Zooxanthellae density (Zoox density), **C + D)** Concentration of light harvesting pigments including chlorophyll-a, chlorophyll-c and peridinin, **E + F)** Concentration of photo-protective pigments including diadinoxanthin and diatoxanthin, and **G + H)** Concentration of light-harvesting pigments per zooxanthellae cell of *Montastrea cavernosa* and *Porites astreoides*. Mean  $\pm$  standard error. Dashed line serves as a reference line at the value measured in the control treatment on day 1 (28°C).

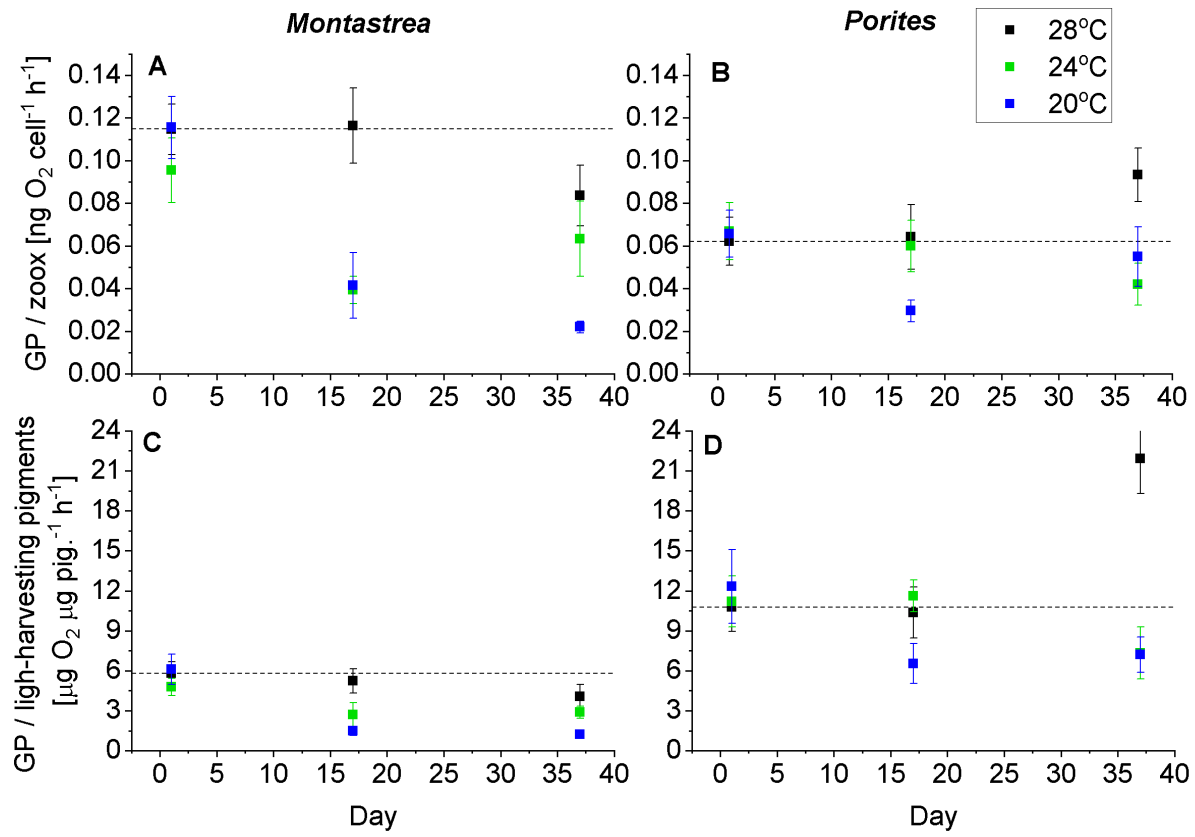

**Fig. S3.** Gross photosynthesis rates (GP) standardized to zooxanthellae metrics measured throughout the course of the experiment. **A + B**) GP per zooxanthellae cell, and **C + D**) GP per amount of light harvesting pigments, latter including chlorophyll-a, chlorophyll-c and peridinin, of *Montastrea cavernosa* and *Porites astreoides*. Mean  $\pm$  standard error. Dashed line serves as a reference line at the value measured in the control treatment on day 1 (28°C).

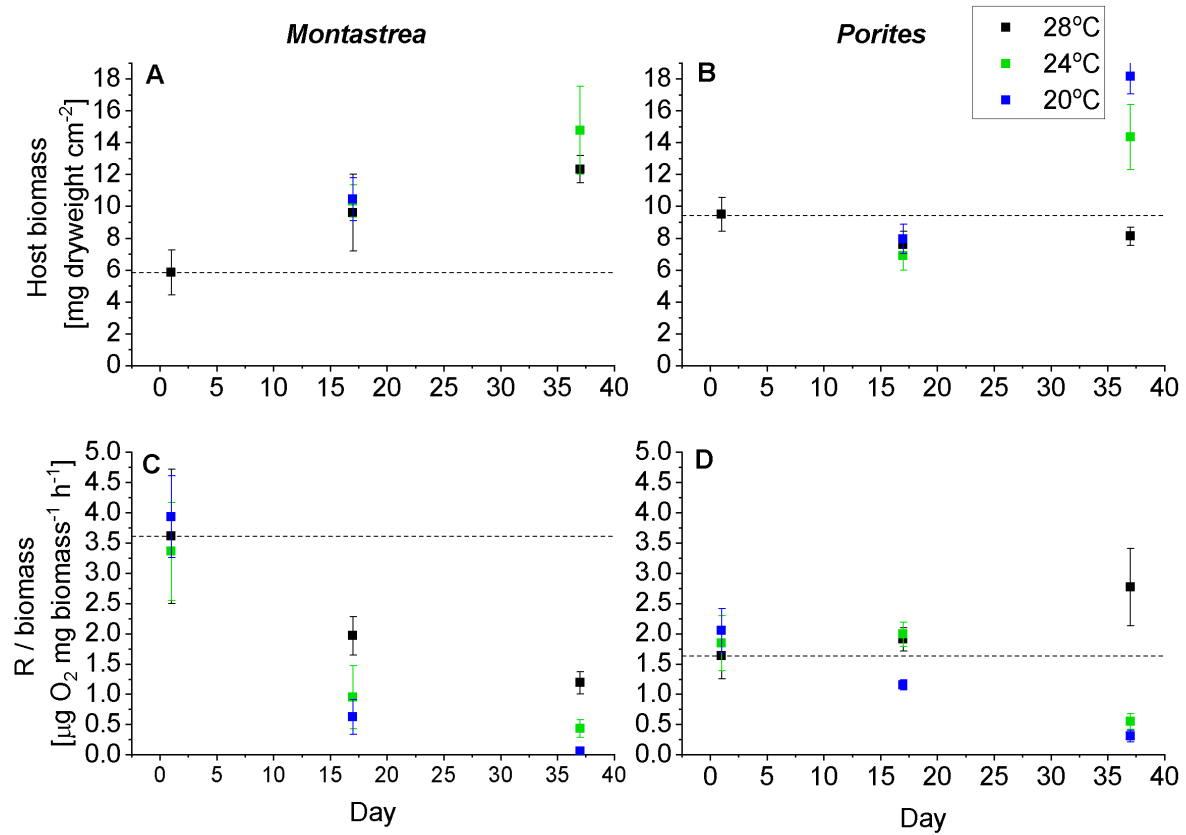

**Fig. S4.** **A + B)** Coral host biomass measured as tissue dry weight and **C + D)** Respiration rate (R) per amount of total coral biomass (host + zooxanthellae) of *Montastrea cavernosa* and *Porites astreoides*. Mean  $\pm$  standard error. Dashed line serves as a reference line at the value measured in the control treatment on day 1 (28°C).

**Table S1.** GLMM results of the random effects including coral replicate (Rep) and replicate treatment aquarium (Tank). Standard deviation (Std.Dev.)

| Response variable              | Random effects | <i>Montastrea</i> |          |          | <i>Porites</i> |          |          |
|--------------------------------|----------------|-------------------|----------|----------|----------------|----------|----------|
|                                |                | poly              | Variance | Std.Dev. | poly           | Variance | Std.Dev. |
| Gross photosynthesis (GP)      | Rep:Tank       | 1                 | 0.013    | 0.112    | 2              | 0.025    | 0.159    |
|                                | Residual       |                   | 0.100    | 0.316    |                | 0.183    | 0.428    |
| Respiration (R)                | Rep:Tank       |                   | 0.031    | 0.176    |                | 0.046    | 0.215    |
|                                | Residual       | 1                 | 0.357    | 0.598    | 2              | 0.356    | 0.597    |
| GP/R                           | Rep:Tank       |                   | 0.021    | 0.144    |                | 0.021    | 0.145    |
|                                | Residual       |                   | 0.365    | 0.604    |                | 0.252    | 0.503    |
| Zooxanthellae (zoox) density   | Rep:Tank       | 1                 | 0.000    | 0.000    | 1              | 0.015    | 0.121    |
|                                | Residual       |                   | 0.040    | 0.201    |                | 0.069    | 0.263    |
| Light-harvesting (LH) pigments | Rep:Tank       |                   | 0.002    | 0.045    |                | 0.016    | 0.127    |
|                                | Residual       | 2                 | 0.058    | 0.241    | 1              | 0.090    | 0.300    |
| Photo-protective pigments      | Rep:Tank       |                   | 0.017    | 0.131    |                | 0.007    | 0.083    |
|                                | Residual       |                   | 0.074    | 0.273    |                | 0.093    | 0.305    |
| LH pigment/zoox                | Rep:Tank       | 2                 | 0.002    | 0.046    | 1              | 411.300  | 20.280   |
|                                | Residual       |                   | 0.064    | 0.253    |                | 1524.500 | 39.050   |
| GP/zoox                        | Rep:Tank       |                   | 0.001    | 0.036    |                | 0.030    | 0.174    |
|                                | Residual       | 2                 | 0.195    | 0.441    | 1              | 0.121    | 0.347    |
| GP/LH pigments                 | Rep:Tank       |                   | 0.015    | 0.122    |                | 0.025    | 0.159    |
|                                | Residual       |                   | 0.193    | 0.440    |                | 0.096    | 0.310    |
| Host biomass                   | Rep:Tank       | 2                 | 0.007    | 0.083    | 1              | 0.006    | 0.076    |
|                                | Residual       |                   | 0.026    | 0.162    |                | 0.019    | 0.137    |
| R/biomass                      | Rep:Tank       |                   | 0.115    | 0.339    |                | 0.025    | 0.159    |
|                                | Residual       | 2                 | 0.243    | 0.493    | 1              | 0.204    | 0.451    |
